# Supplementary material for: Screening for Fusarium Antagonistic Bacteria From Contrasting Niches Designated the Endophyte Bacillus halotolerans as Plant Warden Against Fusarium
Source: PubMed Central journal article supplement (PMC6336696; doi:10.3389/fmicb.2018.03236), 2019-01-11
Supplement: Data_Sheet_1.pdf [file Data_Sheet_1.pdf]

Supplementary Table S1. Details of *Bacillus halotolerans* isolates used in this study.

| Species                      | Strain       | Genome size (Mb) | Plasmid | Description                                                      | GenBank Accession |
|------------------------------|--------------|------------------|---------|------------------------------------------------------------------|-------------------|
| <i>Bacillus halotolerans</i> | FJAT-2398    | 4.09077          | -       | Isolated from agricultural soils (Germany)                       | LUUT00000000.1    |
|                              | ATCC 25096   | 4.07273          | -       | Isolated from desert soils (Morocco)                             | LPVF00000000.1    |
|                              | NRRL B-41617 | 4.09146          | -       | Isolated from river (Spain)                                      | LPVD00000000.1    |
|                              | III-1        | 4.13992          | -       | Isolated from roots of <i>Phoenix dactylifera</i> (Tunisia)      | MBQV00000000.1    |
|                              | BFOA2        | 4.44148          | -       | Isolated from roots of <i>Limoniastrum monopetalum</i> (Tunisia) | PVXB00000000.1    |
|                              | BFOA4        | 4.13265          | -       | Isolated from rhizosphere of wheat plant (Algeria)               | PVXD00000000.1    |
|                              | BFOA1        | 4.09488          | -       | Isolated from roots of <i>Limoniastrum monopetalum</i> (Tunisia) | PVXA00000000.1    |
|                              | BFOA3        | 4.15264          | -       | Isolated from roots of <i>Limoniastrum monopetalum</i> (Tunisia) | PVXC00000000.1    |
|                              | NRRL B-41618 | 4.20528          | -       | Isolated from river (Spain)                                      | LPVE00000000.1    |
|                              | RSCu-8D      | 4.15979          | -       | Isolated from <i>Cuminum cyminum</i> (India)                     | NERK00000000.1    |
|                              | LNXM37       | 4.08166          | -       | Isolated from soil (environmental sample, China)                 | PVQP00000000.1    |
|                              | LNXM78       | 4.17021          | -       | Isolated from soil (environmental sample, China)                 | PVQQ00000000.1    |
|                              | DGL6         | 3.73909          | -       | Isolated from a salt lake (China)                                | PVWC00000000.1    |

Supplementary Table S2. Details of fungal species used in this study.

|    | Species                                                        | Strain | Source                     | Country | GenBank<br>Accession |
|----|----------------------------------------------------------------|--------|----------------------------|---------|----------------------|
|    |                                                                |        |                            |         | ITS                  |
| 1  | <i>Fusarium solani</i>                                         | Fso3   | <i>Olea europaea</i>       | Tunisia | KU528851             |
| 2  | <i>Fusarium solani</i>                                         | Fso12  | <i>Olea europaea</i>       | Tunisia | KU528862             |
| 3  | <i>Fusarium solani</i>                                         | Fso11  | <i>Olea europaea</i>       | Tunisia | KU528861             |
| 4  | <i>Fusarium solani</i>                                         | Fso7   | <i>Olea europaea</i>       | Tunisia | KU528857             |
| 5  | <i>Fusarium solani</i>                                         | Fso5   | <i>Olea europaea</i>       | Tunisia | KU528854             |
| 6  | <i>Fusarium solani</i>                                         | Fso6   | <i>Olea europaea</i>       | Tunisia | KU528855             |
| 7  | <i>Fusarium solani</i>                                         | Fso8   | <i>Olea europaea</i>       | Tunisia | KU528858             |
| 8  | <i>Fusarium solani</i>                                         | Fso9   | <i>Olea europaea</i>       | Tunisia | KU528859             |
| 9  | <i>Fusarium solani</i>                                         | Fso1   | <i>Olea europaea</i>       | Tunisia | KU528848             |
| 10 | <i>Fusarium solani</i>                                         | Fso10  | <i>Olea europaea</i>       | Tunisia | KU528860             |
| 11 | <i>Fusarium solani</i>                                         | Fso13  | <i>Olea europaea</i>       | Tunisia | KU528863             |
| 12 | <i>Fusarium solani</i>                                         | Fso2   | <i>Olea europaea</i>       | Tunisia | KU528850             |
| 13 | <i>Fusarium oxysporum</i>                                      | Fox1   | <i>Olea europaea</i>       | Tunisia | KU528844             |
| 14 | <i>Fusarium oxysporum</i> f.sp.<br><i>radices lycopersicum</i> | FORL   | Tomato                     | Tunisia | -                    |
| 15 | <i>Fusarium acuminatum</i>                                     | Fac    | <i>Olea europaea</i>       | Tunisia | KU528866             |
| 16 | <i>Fusarium<br/>chlamydosporum</i>                             | Fch1   | <i>Olea europaea</i>       | Tunisia | KU528845             |
| 17 | <i>Alternaria</i> sp.                                          | KT1    | <i>Pistacia vera</i>       | Tunisia | -                    |
| 18 | <i>Rhizoctonia bataticola</i>                                  | MAT1   | <i>Olea europaea</i>       | Tunisia | -                    |
| 19 | <i>Phytophthora infestans</i>                                  | LMA1   | Potato                     | Algeria | -                    |
| 20 | <i>Alternaria alternata</i>                                    | LMA2   | Tomato                     | Algeria | -                    |
| 21 | <i>Botrytis cinerea</i>                                        | LMA3   | Strawberry                 | Algeria | -                    |
| 22 | <i>Fusarium oxysporum</i> f.sp.<br><i>albedinis</i>            | LMA1   | <i>Phoenix dactylifera</i> | Algeria | -                    |
| 23 | <i>Fusarium oxysporum</i> f.sp.<br><i>albedinis</i>            | LMA2   | <i>Phoenix dactylifera</i> | Algeria | -                    |
| 24 | <i>Fusarium oxysporum</i> f.sp.<br><i>albedinis</i>            | LMA3   | <i>Phoenix dactylifera</i> | Algeria | -                    |
| 25 | <i>Fusarium oxysporum</i> f.sp.<br><i>albedinis</i>            | LMA4   | <i>Phoenix dactylifera</i> | Algeria | -                    |
|    | <i>Fusarium oxysporum</i> f.sp.<br><i>albedinis</i>            | LMA5   | <i>Phoenix dactylifera</i> | Algeria | -                    |
| 23 | <i>Fusarium solani</i> var.<br><i>coeruleum</i>                | IPP1   | Potato                     | France  | -                    |

Supplementary Table S3. Secondary metabolites of *Bacillus halotolerans* isolates identified with antiSMASH program.

| Strain clusters   | Type                      | Length (bp) | Most similar known clusters                                             | Predicted core clusters                                                                      |
|-------------------|---------------------------|-------------|-------------------------------------------------------------------------|----------------------------------------------------------------------------------------------|
| <b>ATCC 25096</b> |                           |             |                                                                         |                                                                                              |
| Cluster 1         | Nrps                      | 65255       | Surfactin biosynthetic gene cluster (86% of genes show similarity)      | 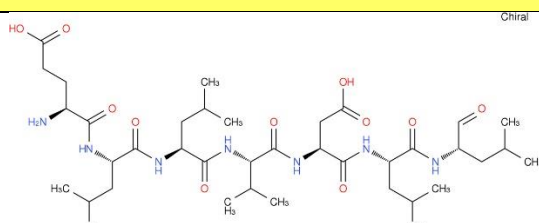 Chiral   |
| Cluster 2         | Nrps                      | 2695        | -                                                                       | -                                                                                            |
| Cluster 3         | Nrps                      | 12795       | Plipastatin biosynthetic gene cluster (38% of genes show similarity)    |  Chiral   |
| Cluster 4         | Nrps                      | 49738       | Bacillibactin biosynthetic gene cluster (100% of genes show similarity) |  Chiral   |
| Cluster 5         | Sactipeptide-Head to tail | 21612       | Subtilosin A biosynthetic gene cluster (100% of genes show similarity)  | -                                                                                            |
| Cluster 6         | Other                     | 41422       | Bacilysin biosynthetic gene cluster (100% of genes show similarity)     | -                                                                                            |
| Cluster 7         | Nrps                      | 90306       | Fengycin biosynthetic gene cluster (80% of genes show similarity)       |  Chiral |

Supplementary Table S3. Continued.

| Strain clusters   | Type                        | Length (bp) | Most similar known clusters                                          | Predicted core clusters                                                             |
|-------------------|-----------------------------|-------------|----------------------------------------------------------------------|-------------------------------------------------------------------------------------|
| <b>ATCC 25096</b> |                             |             |                                                                      |                                                                                     |
| Cluster 8         | Transatpks-<br>Otherks-Nrps | 110097      | Bacillaene biosynthetic gene cluster (100% of genes show similarity) | 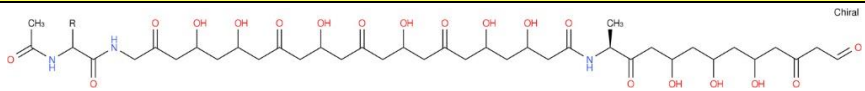 |
| Cluster 9         | Terpene                     | 20806       | -                                                                    | -                                                                                   |
| Cluster 10        | Terpene                     | 21898       | -                                                                    | -                                                                                   |
| Cluster 11        | T3pks                       | 41097       | -                                                                    | -                                                                                   |
| Cluster 12        | Lantipeptide                | 18699       | -                                                                    | -                                                                                   |

Supplementary Table S3. Continued.

| Strain clusters  | Type                    | Length (bp) | Most similar known clusters                                             | Predicted core clusters                                                               |
|------------------|-------------------------|-------------|-------------------------------------------------------------------------|---------------------------------------------------------------------------------------|
| <b>FJAT-2398</b> |                         |             |                                                                         |                                                                                       |
| Cluster 1        | T3pks                   | 41097       | -                                                                       | -                                                                                     |
| Cluster 2        | Terpene                 | 21898       | -                                                                       | -                                                                                     |
| Cluster 3        | Transatpks-Nrps         | 114372      | Fengycin biosynthetic gene cluster (93% of genes show similarity)       | 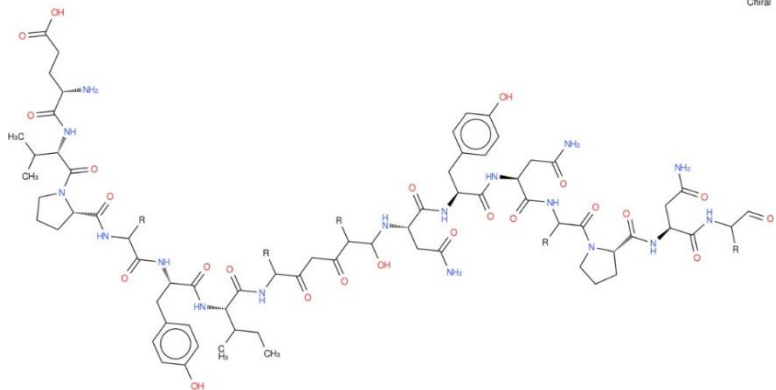   |
| Cluster 4        | Transatpks-Otherks-Nrps | 110096      | Bacillaene biosynthetic gene cluster (100% of genes show similarity)    |    |
| Cluster 5        | Terpene                 | 20806       | -                                                                       | -                                                                                     |
| Cluster 6        | Nrps                    | 65255       | Surfactin biosynthetic gene cluster (86% of genes show similarity)      |   |
| Cluster 7        | Lantipeptide            | 18464       | -                                                                       | -                                                                                     |
| Cluster 8        | Nrps                    | 49738       | Bacillibactin biosynthetic gene cluster (100% of genes show similarity) |  |

Supplementary Table S3. Continued.

| Strain clusters  | Type                          | Length (bp) | Most similar known clusters                                            | Predicted core clusters                                                                       |
|------------------|-------------------------------|-------------|------------------------------------------------------------------------|-----------------------------------------------------------------------------------------------|
| <b>FJAT-2398</b> |                               |             |                                                                        |                                                                                               |
| Cluster 9        | Sactipeptide-<br>Head to tail | 21612       | Subtilosin A biosynthetic gene cluster (100% of genes show similarity) | -                                                                                             |
| Cluster 10       | Other                         | 41422       | Bacilysin biosynthetic gene cluster (100% of genes show similarity)    | -                                                                                             |
| Cluster 11       | Nrps                          | 12929       | Plipastatin biosynthetic gene cluster (38% of genes show similarity)   | 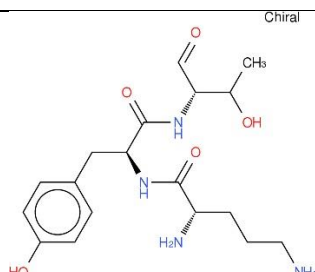<br>Chiral |

Supplementary Table S3. Continued.

| Strain clusters | Type                            | Length (bp) | Most similar known clusters                                          | Predicted core clusters                                                               |
|-----------------|---------------------------------|-------------|----------------------------------------------------------------------|---------------------------------------------------------------------------------------|
| <b>III-1</b>    |                                 |             |                                                                      |                                                                                       |
| Cluster 1       | Nrps                            | 14107       | Fengycin biosynthetic gene cluster (26% of genes show similarity)    | 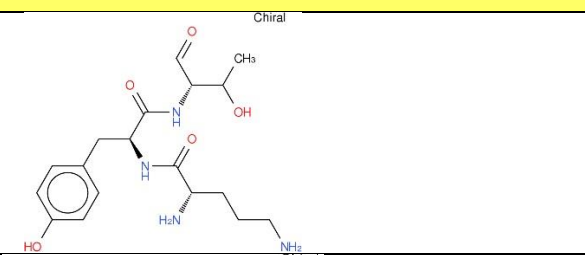   |
| Cluster 2       | Nrps                            | 10652       | Plipastatin biosynthetic gene cluster (23% of genes show similarity) |    |
| Cluster 3       | Transatpks                      | 8404        | Elansolid biosynthetic gene cluster (10% of genes show similarity)   |    |
| Cluster 4       | Transatpks                      | 5353        | -                                                                    | -                                                                                     |
| Cluster 5       | Transatpks                      | 2123        | -                                                                    | -                                                                                     |
| Cluster 6       | Terpene                         | 20806       | -                                                                    | -                                                                                     |
| Cluster 7       | Nrps-<br>Transatpks-<br>Otherks | 110082      | Bacillaene biosynthetic gene cluster (100% of genes show similarity) |   |
| Cluster 8       | Transatpks-<br>Nrps             | 80362       | Fengycin biosynthetic gene cluster (86% of genes show similarity)    |  |
| Cluster 9       | Other                           | 41418       | Bacilysin biosynthetic gene cluster (100% of genes show similarity)  | -                                                                                     |

Supplementary Table S3. Continued.

| Strain clusters | Type                             | Length (bp) | Most similar known clusters                                             | Predicted core clusters                                                               |
|-----------------|----------------------------------|-------------|-------------------------------------------------------------------------|---------------------------------------------------------------------------------------|
| <b>III-1</b>    |                                  |             |                                                                         |                                                                                       |
| Cluster 10      | Sactipeptide-<br>Head to tail    | 21612       | Subtilosin A biosynthetic gene cluster (100% of genes show similarity)  | -                                                                                     |
| Cluster 11      | Nrps                             | 49738       | Bacillibactin biosynthetic gene cluster (100% of genes show similarity) | 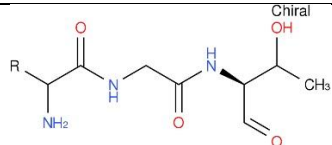   |
| Cluster 12      | T3pks                            | 41097       | -                                                                       | -                                                                                     |
| Cluster 13      | Terpene                          | 21898       | -                                                                       | -                                                                                     |
| Cluster 14      | Nrps                             | 23006       | Plipastatin biosynthetic gene cluster (38% of genes show similarity)    | -                                                                                     |
| Cluster 15      | Nrps                             | 65394       | Surfactin biosynthetic gene cluster (86% of genes show similarity)      |   |
| Cluster 16      | Transatpks                       | 48051       | Phormidolide biosynthetic gene cluster (17% of genes show similarity)   |  |
| Cluster 17      | Transatpks-<br>T1pks-<br>Otherks | 32386       | Phormidolide biosynthetic gene cluster (21% of genes show similarity)   |  |



Supplementary Table S3. Continued.

| Strain clusters     | Type                      | Length (bp) | Most similar known clusters                                            | Predicted core clusters                                                               |
|---------------------|---------------------------|-------------|------------------------------------------------------------------------|---------------------------------------------------------------------------------------|
| <b>NRRL B-41618</b> |                           |             |                                                                        |                                                                                       |
| Cluster 1           | Transatpks-Nrps           | 90713       | Fengycin biosynthetic gene cluster (80% of genes show similarity)      | 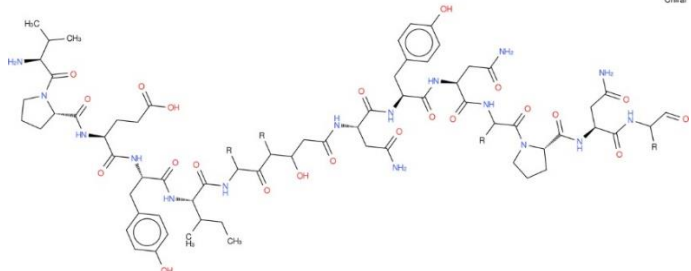   |
| Cluster 2           | Transatpks                | 5608        | -                                                                      | -                                                                                     |
| Cluster 3           | Nrps                      | 14364       | Plipastatin biosynthetic gene cluster (30% of genes show similarity)   |    |
| Cluster 4           | Nrps                      | 65395       | Surfactin biosynthetic gene cluster (86% of genes show similarity)     |   |
| Cluster 5           | Transatpks                | 8190        | Elansolid biosynthetic gene cluster (10% of genes show similarity)     |  |
| Cluster 6           | Nrps                      | 1122        | -                                                                      | -                                                                                     |
| Cluster 7           | Other                     | 41418       | Bacilysin biosynthetic gene cluster (100% of genes show similarity)    | -                                                                                     |
| Cluster 8           | Sactipeptide-Head to tail | 21612       | Subtilosin A biosynthetic gene cluster (100% of genes show similarity) | -                                                                                     |

Supplementary Table S3. Continued.

| Strain clusters     | Type                             | Length (bp) | Most similar known clusters                                             | Predicted core clusters                                                             |
|---------------------|----------------------------------|-------------|-------------------------------------------------------------------------|-------------------------------------------------------------------------------------|
| <b>NRRL B-41618</b> |                                  |             |                                                                         |                                                                                     |
| Cluster 9           | Nrps                             | 49738       | Bacillibactin biosynthetic gene cluster (100% of genes show similarity) | 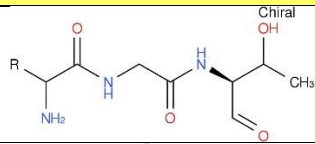 |
| Cluster 10          | Transatpks-<br>Otherks-Nrps      | 110097      | Bacillaene biosynthetic gene cluster (100% of genes show similarity)    |  |
| Cluster 11          | Terpene                          | 20806       | -                                                                       | -                                                                                   |
| Cluster 12          | Nrps                             | 22596       | Plipastatin biosynthetic gene cluster (38% of genes show similarity)    | -                                                                                   |
| Cluster 13          | Terpene                          | 21898       | -                                                                       | -                                                                                   |
| Cluster 14          | Transatpks-<br>T1pks-<br>Otherks | 32280       | Thiomarinol biosynthetic gene cluster (8% of genes show similarity)     |  |
| Cluster 15          | T3pks                            | 41097       | -                                                                       | -                                                                                   |
| Cluster 16          | Transatpks                       | 46509       | Myxovirescin biosynthetic gene cluster (13% of genes show similarity)   |  |

Supplementary Table S3. Continued.

| Strain clusters     | Type                     | Length (bp) | Most similar known clusters                                           | Predicted core clusters                                                               |
|---------------------|--------------------------|-------------|-----------------------------------------------------------------------|---------------------------------------------------------------------------------------|
| <b>NRRL B-41617</b> |                          |             |                                                                       |                                                                                       |
| Cluster 1           | T3pks                    | 41097       | -                                                                     | -                                                                                     |
| Cluster 2           | Terpene                  | 21898       | -                                                                     | -                                                                                     |
| Cluster 3           | Nrps                     | 22905       | Plipastatin biosynthetic gene cluster (38% of genes show similarity)  | -                                                                                     |
| Cluster 4           | Transatpks-T1pks-Otherks | 32259       | Phormidolide biosynthetic gene cluster (21% of genes show similarity) | 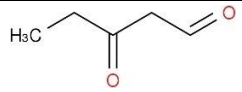   |
| Cluster 5           | Nrps                     | 10181       | Plipastatin biosynthetic gene cluster (23% of genes show similarity)  |    |
| Cluster 6           | Transatpks-Nrps          | 63211       | Fengycin biosynthetic gene cluster (80% of genes show similarity)     |    |
| Cluster 7           | Terpene                  | 20806       | -                                                                     | -                                                                                     |
| Cluster 8           | Nrps-Transatpks-Otherks  | 110093      | Bacillaene biosynthetic gene cluster (100% of genes show similarity)  |   |
| Cluster 9           | Transatpks               | 8405        | Elansolid biosynthetic gene cluster (10% of genes show similarity)    |  |
| Cluster 10          | Transatpks               | 2083        | -                                                                     | -                                                                                     |
| Cluster 11          | Nrps                     | 65394       | Surfactin biosynthetic gene cluster (86% of genes show similarity)    |  |

Supplementary Table S3. Continued.

| Strain clusters     | Type                      | Length (bp) | Most similar known clusters                                             | Predicted core clusters                                                              |
|---------------------|---------------------------|-------------|-------------------------------------------------------------------------|--------------------------------------------------------------------------------------|
| <b>NRRL B-41617</b> |                           |             |                                                                         |                                                                                      |
| Cluster 12          | Other                     | 41418       | Bacilysin biosynthetic gene cluster (100% of genes show similarity)     | -                                                                                    |
| Cluster 13          | Transatpks                | 46517       | Myxovirescin biosynthetic gene cluster (13% of genes show similarity)   | 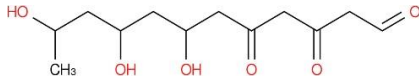  |
| Cluster 14          | Nrps                      | 49738       | Bacillibactin biosynthetic gene cluster (100% of genes show similarity) |   |
| Cluster 15          | Sactipeptide-Head to tail | 21612       | Subtilosin A biosynthetic gene cluster (100% of genes show similarity)  | -                                                                                    |
| Cluster 16          | Nrps                      | 15038       | Plipastatin biosynthetic gene cluster (30% of genes show similarity)    |  |

Supplementary Table S3. Continued.

| Strain clusters   | Type                            | Length (bp) | Most similar known clusters                                             | Predicted core clusters                                                               |
|-------------------|---------------------------------|-------------|-------------------------------------------------------------------------|---------------------------------------------------------------------------------------|
| <b>BFOA2 (72)</b> |                                 |             |                                                                         |                                                                                       |
| Cluster 1         | Nrps-<br>Transatpks-<br>Otherks | 110091      | Bacillaene biosynthetic gene cluster (100% of genes show similarity)    | 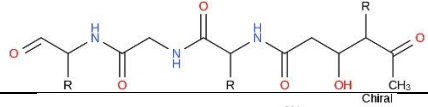   |
| Cluster 2         | Nrps                            | 33415       | Fengycin biosynthetic gene cluster (80% of genes show similarity)       |    |
| Cluster 3         | Sactipeptide-<br>Head_to_tail   | 21612       | Subtilosin A biosynthetic gene cluster (100% of genes show similarity)  | -                                                                                     |
| Cluster 4         | Other                           | 41418       | Bacilysin biosynthetic gene cluster (100% of genes show similarity)     | -                                                                                     |
| Cluster 5         | Bacteriocin                     | 12183       | -                                                                       | -                                                                                     |
| Cluster 6         | T3pks                           | 41097       | -                                                                       | -                                                                                     |
| Cluster 7         | Terpene                         | 21898       | -                                                                       | -                                                                                     |
| Cluster 8         | Nrps                            | 65395       | Surfactin biosynthetic gene cluster (86% of genes show similarity)      |   |
| Cluster 9         | Transatpks-<br>Nrps             | 61278       | Kijanamicin biosynthetic gene cluster (4% of genes show similarity)     |  |
| Cluster 10        | Terpene                         | 20806       | -                                                                       | -                                                                                     |
| Cluster 11        | Nrps                            | 43656       | Bacillibactin biosynthetic gene cluster (100% of genes show similarity) |  |
| Cluster 12        | Nrps                            | 23268       | Plipastatin biosynthetic gene cluster (46% of genes show similarity)    | -                                                                                     |

Supplementary Table S3. Continued.

| Strain clusters   | Type | Length (bp) | Most similar known clusters                                          | Predicted core clusters                                                             |
|-------------------|------|-------------|----------------------------------------------------------------------|-------------------------------------------------------------------------------------|
| <b>BFOA2 (72)</b> |      |             |                                                                      |                                                                                     |
| Cluster 13        | Nrps | 13200       | Plipastatin biosynthetic gene cluster (38% of genes show similarity) | 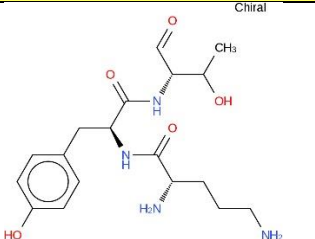 |
| Cluster 14        | Nrps | 10296       | Plipastatin biosynthetic gene cluster (15% of genes show similarity) |  |

Supplementary Table S3. Continued.

| Strain clusters   | Type                            | Length (bp) | Most similar known clusters                                             | Predicted core clusters                                                               |
|-------------------|---------------------------------|-------------|-------------------------------------------------------------------------|---------------------------------------------------------------------------------------|
| <b>BFOA1 (86)</b> |                                 |             |                                                                         |                                                                                       |
| Cluster 1         | Terpene                         | 20806       | -                                                                       | -                                                                                     |
| Cluster 2         | Nrps-<br>Transatpks-<br>Otherks | 110091      | Bacillaene biosynthetic gene cluster (100% of genes show similarity)    | 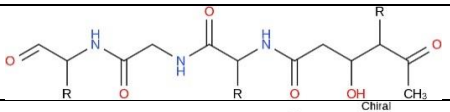   |
| Cluster 3         | Nrps                            | 33415       | Fengycin biosynthetic gene cluster (80% of genes show similarity)       |    |
| Cluster 4         | Sactipeptide-<br>Head to tail   | 21612       | Subtilosin A biosynthetic gene cluster (100% of genes show similarity)  | -                                                                                     |
| Cluster 5         | Other                           | 41418       | Bacilysin biosynthetic gene cluster (100% of genes show similarity)     | -                                                                                     |
| Cluster 6         | Bacteriocin                     | 12183       | -                                                                       | -                                                                                     |
| Cluster 7         | Transatpks-<br>Nrps             | 61278       | Kijanamicin biosynthetic gene cluster (4% of genes show similarity)     |    |
| Cluster 8         | T3pks                           | 41097       | -                                                                       | -                                                                                     |
| Cluster 9         | Terpene                         | 21898       | -                                                                       | -                                                                                     |
| Cluster 10        | Nrps                            | 25324       | Surfactin biosynthetic gene cluster (43% of genes show similarity)      | -                                                                                     |
| Cluster 11        | Nrps                            | 28547       | Surfactin biosynthetic gene cluster (47% of genes show similarity)      |  |
| Cluster 12        | Nrps                            | 43656       | Bacillibactin biosynthetic gene cluster (100% of genes show similarity) |  |

Supplementary Table S3. Continued.

| Strain clusters   | Type  | Length (bp) | Most similar known clusters                                          | Predicted core clusters                                                             |
|-------------------|-------|-------------|----------------------------------------------------------------------|-------------------------------------------------------------------------------------|
| <b>BFOA1 (86)</b> |       |             |                                                                      |                                                                                     |
| Cluster 13        | Nrps  | 23268       | Plipastatin biosynthetic gene cluster (46% of genes show similarity) | -                                                                                   |
| Cluster 14        | Nrps  | 13615       | Fengycin biosynthetic gene cluster (26% of genes show similarity)    | 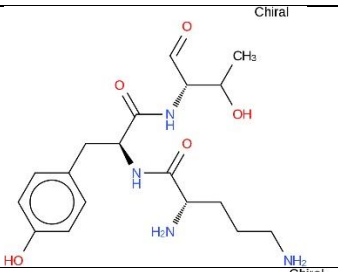 |
| Cluster 15        | Nrps  | 10296       | Plipastatin biosynthetic gene cluster (15% of genes show similarity) |  |
| Cluster 16        | Nrps  | 9326        | Surfactin biosynthetic gene cluster (8% of genes show similarity)    |  |
| Cluster 17        | Other | 1009        | -                                                                    | -                                                                                   |



Supplementary Table S3. Continued.

| Strain clusters | Type                      | Length (bp) | Most similar known clusters                                             | Predicted core clusters                                                               |
|-----------------|---------------------------|-------------|-------------------------------------------------------------------------|---------------------------------------------------------------------------------------|
| <b>LNXM37</b>   |                           |             |                                                                         |                                                                                       |
| Cluster 1       | Other                     | 41418       | Bacilysin biosynthetic gene cluster (100% of genes show similarity)     | -                                                                                     |
| Cluster 2       | Sactipeptide-Head to tail | 21612       | Subtilosin A biosynthetic gene cluster (100% of genes show similarity)  | -                                                                                     |
| Cluster 3       | Nrps                      | 49738       | Bacillibactin biosynthetic gene cluster (100% of genes show similarity) | 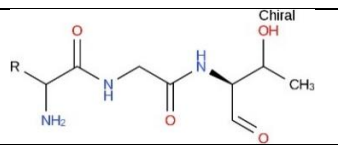   |
| Cluster 4       | Nrps-Transatpks-Otherks   | 110098      | Bacillaene biosynthetic gene cluster (100% of genes show similarity)    |    |
| Cluster 5       | Nrps                      | 33354       | Fengycin biosynthetic gene cluster (80% of genes show similarity)       |    |
| Cluster 6       | T3pks                     | 41097       | -                                                                       | -                                                                                     |
| Cluster 7       | Terpene                   | 21898       | -                                                                       | -                                                                                     |
| Cluster 8       | Nrps                      | 26072       | Surfactin biosynthetic gene cluster (43% of genes show similarity)      | -                                                                                     |
| Cluster 9       | Terpene                   | 20806       | -                                                                       | -                                                                                     |
| Cluster 10      | Lantipeptide              | 22597       | -                                                                       | -                                                                                     |
| Cluster 11      | Nrps                      | 21754       | Plipastatin biosynthetic gene cluster (30% of genes show similarity)    | -                                                                                     |
| Cluster 12      | Nrps                      | 28299       | Surfactin biosynthetic gene cluster (47% of genes show similarity)      |  |

Supplementary Table S3. Continued.

| Strain clusters | Type | Length (bp) | Most similar known clusters                                          | Predicted core clusters                                                             |
|-----------------|------|-------------|----------------------------------------------------------------------|-------------------------------------------------------------------------------------|
| <b>LNXM37</b>   |      |             |                                                                      |                                                                                     |
| Cluster 13      | Nrps | 13179       | Plipastatin biosynthetic gene cluster (23% of genes show similarity) | 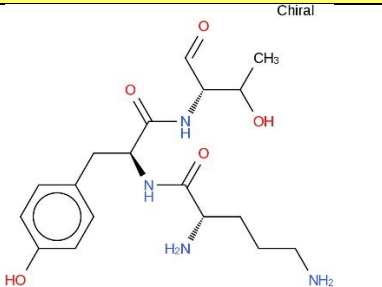 |
| Cluster 14      | Nrps | 9879        | Plipastatin biosynthetic gene cluster (15% of genes show similarity) |  |
| Cluster 15      | Nrps | 9291        | Surfactin biosynthetic gene cluster (8% of genes show similarity)    |  |

Supplementary Table S3. Continued.

| Strain clusters   | Type                            | Length (bp) | Most similar known clusters                                            | Predicted core clusters                                                               |
|-------------------|---------------------------------|-------------|------------------------------------------------------------------------|---------------------------------------------------------------------------------------|
| <b>BFOA3 (36)</b> |                                 |             |                                                                        |                                                                                       |
| Cluster 1         | Nrps-<br>Transatpks-<br>Otherks | 110091      | Bacillaene biosynthetic gene cluster (100% of genes show similarity)   | 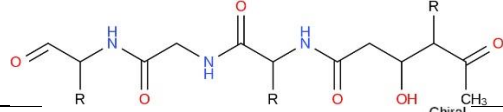   |
| Cluster 2         | Nrps                            | 33415       | Fengycin biosynthetic gene cluster (80% of genes show similarity)      |    |
| Cluster 3         | Sactipeptide-<br>Head to tail   | 21612       | Subtilosin A biosynthetic gene cluster (100% of genes show similarity) | -                                                                                     |
| Cluster 4         | Other                           | 41418       | Bacilysin biosynthetic gene cluster (100% of genes show similarity)    | -                                                                                     |
| Cluster 5         | Bacteriocin                     | 12183       | -                                                                      | -                                                                                     |
| Cluster 6         | Transatpks-<br>Nrps             | 61278       | Kijanamicin biosynthetic gene cluster (4% of genes show similarity)    |    |
| Cluster 7         | T3pks                           | 41097       | -                                                                      | -                                                                                     |
| Cluster 8         | Terpene                         | 21898       | -                                                                      | -                                                                                     |
| Cluster 9         | Terpene                         | 20806       | -                                                                      | -                                                                                     |
| Cluster 10        | Nrps                            | 25324       | Surfactin biosynthetic gene cluster (43% of genes show similarity)     | -                                                                                     |
| Cluster 11        | Nrps                            | 28547       | Surfactin biosynthetic gene cluster (47% of genes show similarity)     |  |

Supplementary Table S3. Continued.

| Strain clusters   | Type  | Length (bp) | Most similar known clusters                                             | Predicted core clusters                                                               |
|-------------------|-------|-------------|-------------------------------------------------------------------------|---------------------------------------------------------------------------------------|
| <b>BFOA3 (36)</b> |       |             |                                                                         |                                                                                       |
| Cluster 12        | Nrps  | 43656       | Bacillibactin biosynthetic gene cluster (100% of genes show similarity) | 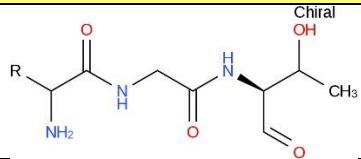   |
| Cluster 13        | Nrps  | 23268       | Plipastatin biosynthetic gene cluster (46% of genes show similarity)    | -                                                                                     |
| Cluster 14        | Nrps  | 13200       | Plipastatin biosynthetic gene cluster (38% of genes show similarity)    |    |
| Cluster 15        | Nrps  | 10296       | Plipastatin biosynthetic gene cluster (15% of genes show similarity)    |   |
| Cluster 16        | Nrps  | 9326        | Surfactin biosynthetic gene cluster (8% of genes show similarity)       |  |
| Cluster 17        | Other | 1009        | -                                                                       | -                                                                                     |

Supplementary Table S3. Continued.

| Strain clusters | Type                      | Length (bp) | Most similar known clusters                                             | Predicted core clusters                                                               |
|-----------------|---------------------------|-------------|-------------------------------------------------------------------------|---------------------------------------------------------------------------------------|
| <b>LNXM78</b>   |                           |             |                                                                         |                                                                                       |
| Cluster 1       | Nrps                      | 49738       | Bacillibactin biosynthetic gene cluster (100% of genes show similarity) | 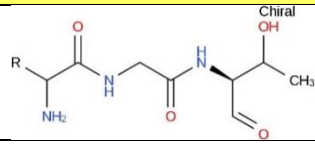   |
| Cluster 2       | Sactipeptide-Head to tail | 21612       | Subtilosin A biosynthetic gene cluster (100% of genes show similarity)  | -                                                                                     |
| Cluster 3       | Other                     | 41418       | Bacilysin biosynthetic gene cluster (100% of genes show similarity)     | -                                                                                     |
| Cluster 4       | T3pks                     | 41097       | -                                                                       | -                                                                                     |
| Cluster 5       | Terpene                   | 20806       | -                                                                       | -                                                                                     |
| Cluster 6       | Nrps-Transatpks-Otherks   | 110098      | Bacillaene biosynthetic gene cluster (100% of genes show similarity)    |    |
| Cluster 7       | Nrps                      | 65395       | Surfactin biosynthetic gene cluster (86% of genes show similarity)      |   |
| Cluster 8       | Terpene                   | 21898       | -                                                                       | -                                                                                     |
| Cluster 9       | Lantipeptide              | 21755       | -                                                                       | -                                                                                     |
| Cluster 10      | Nrps                      | 33542       | Fengycin biosynthetic gene cluster (80% of genes show similarity)       |  |
| Cluster 11      | Nrps                      | 21938       | Plipastatin biosynthetic gene cluster (30% of genes show similarity)    | -                                                                                     |

Supplementary Table S3. Continued.

| Strain clusters | Type  | Length (bp) | Most similar known clusters                                          | Predicted core clusters                                                             |
|-----------------|-------|-------------|----------------------------------------------------------------------|-------------------------------------------------------------------------------------|
| <b>LNXM78</b>   |       |             |                                                                      |                                                                                     |
| Cluster 12      | Nrps  | 13531       | Plipastatin biosynthetic gene cluster (23% of genes show similarity) | 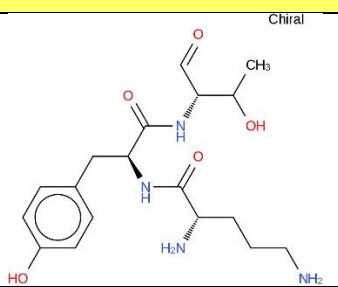 |
| Cluster 13      | Nrps  | 10317       | Plipastatin biosynthetic gene cluster (23% of genes show similarity) |  |
| Cluster 14      | Other | 1052        | -                                                                    | -                                                                                   |
| Cluster 15      | Other | 1052        | -                                                                    | -                                                                                   |

Supplementary Table S3. Continued.

| Strain clusters    | Type                      | Length (bp) | Most similar known clusters                                             | Predicted core clusters                                                                      |
|--------------------|---------------------------|-------------|-------------------------------------------------------------------------|----------------------------------------------------------------------------------------------|
| <b>BFOA4 (B19)</b> |                           |             |                                                                         |                                                                                              |
| Cluster 1          | Terpene                   | 20806       | -                                                                       | -                                                                                            |
| Cluster 2          | Other                     | 41418       | Bacilysin biosynthetic gene cluster (100% of genes show similarity)     | -                                                                                            |
| Cluster 3          | Sactipeptide-Head to tail | 21612       | Subtilosin A biosynthetic gene cluster (100% of genes show similarity)  | -                                                                                            |
| Cluster 4          | Transatpks-Otherks-Nrps   | 105327      | Bacillaene biosynthetic gene cluster (100% of genes show similarity)    | 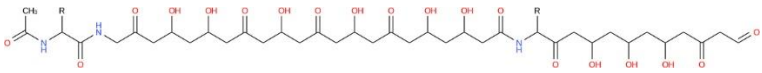          |
| Cluster 5          | Lantipeptide              | 22597       | -                                                                       | -                                                                                            |
| Cluster 6          | Nrps                      | 65395       | Surfactin biosynthetic gene cluster (86% of genes show similarity)      |  Chiral   |
| Cluster 7          | Nrps                      | 49738       | Bacillibactin biosynthetic gene cluster (100% of genes show similarity) |  Chiral  |
| Cluster 8          | T3pks                     | 41097       | -                                                                       | -                                                                                            |
| Cluster 9          | Nrps                      | 33485       | Fengycin biosynthetic gene cluster (80% of genes show similarity)       |  Chiral |
| Cluster 10         | Terpene                   | 21898       | -                                                                       | -                                                                                            |

Supplementary Table S3. Continued.

| Strain clusters    | Type | Length (bp) | Most similar known clusters                                          | Predicted core clusters |
|--------------------|------|-------------|----------------------------------------------------------------------|-------------------------|
| <b>BFOA4 (B19)</b> |      |             |                                                                      |                         |
| Cluster 11         | Nrps | 13174       | Plipastatin biosynthetic gene cluster (30% of genes show similarity) |                         |
| Cluster 12         | Nrps | 9618        | Plipastatin biosynthetic gene cluster (23% of genes show similarity) |                         |
| Cluster 13         | Nrps | 5050        | Plipastatin biosynthetic gene cluster (23% of genes show similarity) | -                       |



Supplementary Table S3. Continued.

| Strain clusters | Type                            | Length (bp) | Most similar known clusters                                           | Predicted core clusters                                                               |
|-----------------|---------------------------------|-------------|-----------------------------------------------------------------------|---------------------------------------------------------------------------------------|
| <b>RSCu-8D</b>  |                                 |             |                                                                       |                                                                                       |
| Cluster 1       | Nrps                            | 9233        | Plipastatin biosynthetic gene cluster (15% of genes show similarity)  | 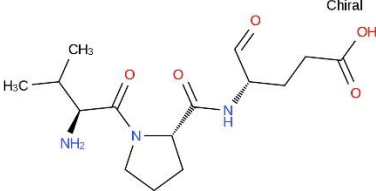   |
| Cluster 2       | Terpene                         | 20806       | -                                                                     | -                                                                                     |
| Cluster 3       | Nrps-<br>Transatpks-<br>Otherks | 110097      | Bacillaene biosynthetic gene cluster (100% of genes show similarity)  |    |
| Cluster 4       | Nrps                            | 57204       | Fengycin biosynthetic gene cluster (93% of genes show similarity)     |    |
| Cluster 5       | Terpene                         | 21898       | -                                                                     | -                                                                                     |
| Cluster 6       | T3pks                           | 41097       | -                                                                     | -                                                                                     |
| Cluster 7       | Transatpks                      | 46339       | Myxovirescin biosynthetic gene cluster (13% of genes show similarity) |  |
| Cluster 8       | Transatpks                      | 5388        | -                                                                     | -                                                                                     |
| Cluster 9       | Nrps                            | 12848       | Plipastatin biosynthetic gene cluster (38% of genes show similarity)  |  |

Supplementary Table S3. Continued.

| Strain clusters | Type                      | Length (bp) | Most similar known clusters                                             | Predicted core clusters                                                               |
|-----------------|---------------------------|-------------|-------------------------------------------------------------------------|---------------------------------------------------------------------------------------|
| <b>RSCu-8D</b>  |                           |             |                                                                         |                                                                                       |
| Cluster 10      | Nrps                      | 49738       | Bacillibactin biosynthetic gene cluster (100% of genes show similarity) | 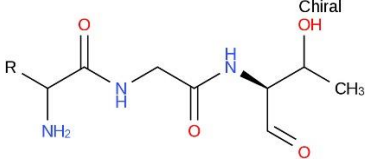   |
| Cluster 11      | Transatpks                | 8471        | Elansolid biosynthetic gene cluster (10% of genes show similarity)      |    |
| Cluster 12      | Nrps                      | 65394       | Surfactin biosynthetic gene cluster (86% of genes show similarity)      |    |
| Cluster 13      | Sactipeptide-Head to tail | 21612       | Subtilosin A biosynthetic gene cluster (100% of genes show similarity)  | -                                                                                     |
| Cluster 14      | Other                     | 41418       | Bacilysin biosynthetic gene cluster (100% of genes show similarity)     | -                                                                                     |
| Cluster 15      | Transatpks-T1pks-Otherks  | 32875       | Thiomarinol biosynthetic gene cluster (8% of genes show similarity)     |  |

Supplementary Table S3. Continued.

| Strain clusters | Type                            | Length (bp) | Most similar known clusters                                             | Predicted core clusters                                                               |
|-----------------|---------------------------------|-------------|-------------------------------------------------------------------------|---------------------------------------------------------------------------------------|
| <b>DGL6</b>     |                                 |             |                                                                         |                                                                                       |
| Cluster 1       | T3pks                           | 41097       | -                                                                       | -                                                                                     |
| Cluster 2       | Terpene                         | 21898       | -                                                                       | -                                                                                     |
| Cluster 3       | Nrps                            | 21680       | Plipastatin biosynthetic gene cluster (30% of genes show similarity)    | -                                                                                     |
| Cluster 4       | Terpene                         | 20806       | -                                                                       | -                                                                                     |
| Cluster 5       | Nrps-<br>Transatpks-<br>Otherks | 110103      | Bacillaene biosynthetic gene cluster (100% of genes show similarity)    | 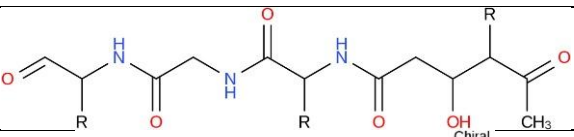   |
| Cluster 6       | Nrps                            | 33899       | Fengycin biosynthetic gene cluster (86% of genes show similarity)       |    |
| Cluster 7       | Sactipeptide-<br>Head to tail   | 21612       | Subtilosin A biosynthetic gene cluster (100% of genes show similarity)  | -                                                                                     |
| Cluster 8       | Other                           | 41418       | Bacilysin biosynthetic gene cluster (100% of genes show similarity)     | -                                                                                     |
| Cluster 9       | Nrps                            | 49738       | Bacillibactin biosynthetic gene cluster (100% of genes show similarity) |  |
| Cluster 10      | Nrps                            | 14513       | Plipastatin biosynthetic gene cluster (30% of genes show similarity)    |  |

Supplementary Table S3. Continued.

| Strain clusters | Type | Length (bp) | Most similar known clusters                                          | Predicted core clusters                                                                                                                                                                                                                                                                                                                                                                                                                                                |
|-----------------|------|-------------|----------------------------------------------------------------------|------------------------------------------------------------------------------------------------------------------------------------------------------------------------------------------------------------------------------------------------------------------------------------------------------------------------------------------------------------------------------------------------------------------------------------------------------------------------|
| <b>DGL6</b>     |      |             |                                                                      |                                                                                                                                                                                                                                                                                                                                                                                                                                                                        |
| Cluster 11      | Nrps | 11005       | Plipastatin biosynthetic gene cluster (23% of genes show similarity) | 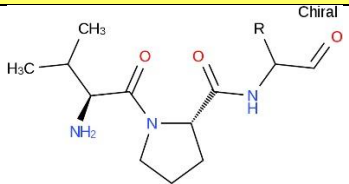<br>The chemical structure shows a pyrrolidine ring with an amide group attached to its nitrogen. The amide nitrogen is also bonded to a chiral center (labeled 'Chiral') which is further substituted with an aldehyde group and an 'R' group. Another amide group is attached to the chiral center, which is also substituted with a methyl group (H3C) and an amino group (NH2). |
| Cluster 12      | Nrps | 1354        | -                                                                    | -                                                                                                                                                                                                                                                                                                                                                                                                                                                                      |

Supplementary Table S4. Compounds identified in *Bacillus halotolerans* isolates secreted fraction by LC-MS analysis.

| Rt (min) | HRESIMS  | Molecular formula                                               | Tentative identification             | Structure                                                                            | BFOA 4 | BFOA 3 | BFOA 2 | BFOA 1 | PGP activity            | Biocontrol / antimicrobial activity | Herbicidal activity |
|----------|----------|-----------------------------------------------------------------|--------------------------------------|--------------------------------------------------------------------------------------|--------|--------|--------|--------|-------------------------|-------------------------------------|---------------------|
| 1.39     | 188.0699 | C <sub>11</sub> H <sub>11</sub> NO <sub>2</sub>                 | Indole propionic acid                | 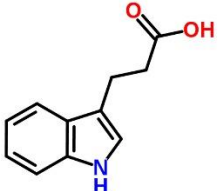  | +      | +      | +      | +      | Zhang and Davies (2016) | -                                   | -                   |
| 1.71     | 197.1277 | C <sub>10</sub> H <sub>18</sub> N <sub>2</sub> O <sub>2</sub>   | Cyclo(L-Leu-N-methyl-L-Ala)          |    | -      | +      | +      | +      | -                       | -                                   | -                   |
| 2.20     | 302.0819 | C <sub>11</sub> H <sub>17</sub> N <sub>3</sub> O <sub>5</sub> S | 2-thio-5(N-methylaminomethyl)uridine |    | -      | -      | +      | +      | -                       | -                                   | -                   |
| 2.62     | 289.1550 | C <sub>16</sub> H <sub>22</sub> N <sub>2</sub> O <sub>3</sub>   | Inthomycin-A                         |   | +      | +      | +      | +      | -                       | Webb et al. (2008)                  | Webb et al. (2008)  |
| 2.90     | 211.1433 | C <sub>11</sub> H <sub>20</sub> N <sub>2</sub> O <sub>2</sub>   | Cyclo(L-Val-L-Leu)                   |  | +      | +      | +      | +      | -                       | -                                   | -                   |
| 3.49     | 245.1270 | C <sub>14</sub> H <sub>18</sub> N <sub>2</sub> O <sub>2</sub>   | Cyclo(L-Val-L-Phe)                   |  | -      | +      | -      | +      | -                       | Guo et al. (2011)                   | -                   |

Supplementary Table 4. Continued.

| Rt (min) | HRESIMS   | Molecular formula                                               | Tentative identification                                         | Structure                                                                            | BFOA 4 | BFOA 3 | BFOA 2 | BFOA 1 | PGP activity | Biocontrol / antimicrobial activity | Herbicidal activity |
|----------|-----------|-----------------------------------------------------------------|------------------------------------------------------------------|--------------------------------------------------------------------------------------|--------|--------|--------|--------|--------------|-------------------------------------|---------------------|
| 4.46     | 340.2242  | C <sub>17</sub> H <sub>31</sub> N <sub>3</sub> O <sub>4</sub>   | Diprotin A (Isoleucyl Proyl Isoleucine)                          | 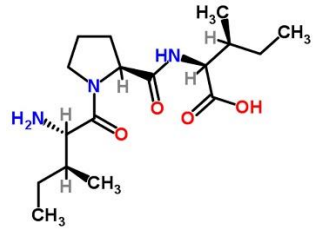   | +      | +      | +      | +      | -            | -                                   | -                   |
| 5.07     | 322.1295  | C <sub>16</sub> H <sub>21</sub> NO <sub>6</sub>                 | Methyl 3-acetamido-4,6-O-benzylidene-3-deoxy-β-D-glucopyranoside |    | +      | -      | -      | -      | -            | -                                   | -                   |
| 5.17     | 239.1187  | C <sub>15</sub> H <sub>16</sub> N <sub>2</sub> O                | 3-(2-Butyl-5-oxazolyl)-1H-indole                                 |   | +      | -      | -      | -      | -            | -                                   | -                   |
| 5.97     | 205.0966  | C <sub>11</sub> H <sub>14</sub> N <sub>2</sub> O <sub>2</sub>   | N-Acetylkynuramine                                               |  | +      | -      | -      | -      | -            | -                                   | -                   |
| 6.90     | 1139.6985 | C <sub>60</sub> H <sub>92</sub> N <sub>12</sub> O <sub>10</sub> | Gramicidin S                                                     |  | +      | +      | +      | +      | -            | Gause and Brazhnikova (1944)        | -                   |

Supplementary Table 4. Continued.

| Rt (min) | HRESIMS   | Molecular formula                                                | Tentative identification | Structure                                                                            | BFOA 4 | BFOA 3 | BFOA 2 | BFOA 1 | PGP activity | Biocontrol / antimicrobial activity | Herbicidal activity |
|----------|-----------|------------------------------------------------------------------|--------------------------|--------------------------------------------------------------------------------------|--------|--------|--------|--------|--------------|-------------------------------------|---------------------|
| 7.28     | 406.2300  | C <sub>16</sub> H <sub>33</sub> N <sub>5</sub> O <sub>7</sub>    | 5-Deoxybutirosamine      | 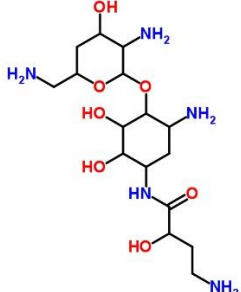   | +      | -      | -      | -      | -            | Taylor and Schmitz (1976)           | -                   |
| 7.33     | 1475.8043 | C <sub>73</sub> H <sub>112</sub> N <sub>12</sub> O <sub>20</sub> | Plipastatin A2           |    | +      | +      | +      | +      | -            | Umezawa et al. (1986)               | -                   |
| 7.44     | 1125.6832 | C <sub>59</sub> H <sub>90</sub> N <sub>12</sub> O <sub>10</sub>  | Gramicidin S2            |   | +      | +      | +      | +      | -            | Solanas et al. (2009)               | -                   |
| 7.51     | 830.4935  | C <sub>44</sub> H <sub>65</sub> N <sub>9</sub> O <sub>7</sub>    | Gramicidin-J             |  | +      | +      | +      | +      | -            | Hunter and Schwartz (1967)          | -                   |

Supplementary Table 4. Continued.

| Rt (min) | HRESIMS   | Molecular formula                                                | Tentative identification | Structure                                                                            | BFOA 4 | BFOA 3 | BFOA 2 | BFOA 1 | PGP activity        | Biocontrol / antimicrobial activity | Herbicidal activity |
|----------|-----------|------------------------------------------------------------------|--------------------------|--------------------------------------------------------------------------------------|--------|--------|--------|--------|---------------------|-------------------------------------|---------------------|
| 7.61     | 1461.7884 | C <sub>72</sub> H <sub>110</sub> N <sub>12</sub> O <sub>20</sub> | Plipastatin A1           | 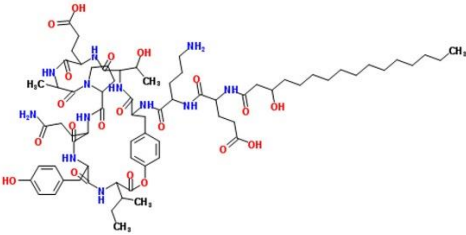   | +      | -      | +      | +      | -                   | Ma and Hu (2018)                    | -                   |
| 7.66     | 1489.8196 | C <sub>74</sub> H <sub>114</sub> N <sub>12</sub> O <sub>20</sub> | Plipastatin B1           |    | +      | -      | +      | +      | -                   | Tsuge et al. (1996)                 | -                   |
| 7.97     | 845.4376  | C <sub>35</sub> H <sub>62</sub> N <sub>10</sub> O <sub>14</sub>  | Rotihibin-B              |   | +      | -      | -      | -      | Fukuchi et al. 1995 | -                                   | -                   |
| 8.39     | 961.6161  | C <sub>41</sub> H <sub>82</sub> N <sub>14</sub> O <sub>12</sub>  | Galantin-I               |  | +      | -      | -      | -      | -                   | Sakai and Ohfuné (1992)             | -                   |



Supplementary Table 4. Continued.

| Rt (min) | HRESIMS   | Molecular formula                                               | Tentative identification    | Structure                                                                          | BFOA 4 | BFOA 3 | BFOA 2 | BFOA 1 | PGP activity | Biocontrol / antimicrobial activity        | Herbicidal activity |
|----------|-----------|-----------------------------------------------------------------|-----------------------------|------------------------------------------------------------------------------------|--------|--------|--------|--------|--------------|--------------------------------------------|---------------------|
| 8.46     | 993.6427  | C <sub>42</sub> H <sub>86</sub> N <sub>14</sub> O <sub>13</sub> | Lysinegalantin I            | –                                                                                  | +      | +      | +      | +      | –            | –                                          | –                   |
| 8.57     | 1007.6763 | C <sub>51</sub> H <sub>92</sub> N <sub>8</sub> O <sub>12</sub>  | Pseudofactin I              | 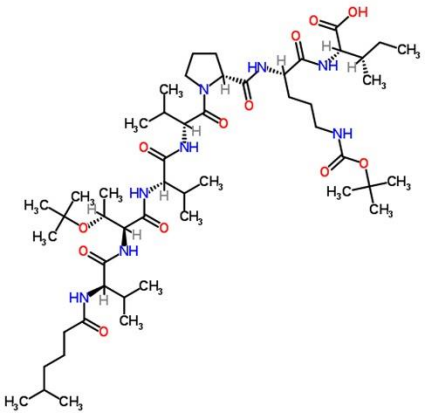 | +      | +      | +      | +      | –            | Janek et al. (2012); Biniarz et al. (2015) | –                   |
| 8.62     | 1021.6916 | C <sub>52</sub> H <sub>94</sub> N <sub>8</sub> O <sub>12</sub>  | Pseudofactin II             | –                                                                                  |        |        |        |        |              |                                            |                     |
| 9.28     | 339.3266  | C <sub>22</sub> H <sub>44</sub> O <sub>2</sub>                  | 20-methylheneicosanoic acid |  | –      | +      | +      | +      | –            | –                                          | –                   |

Supplementary Table S5. Compounds identified in *Bacillus halotolerans* strains secreted fraction by GC-MS analysis.

| Rt (min) | Kovat's Index | Molecular formula                | Tentative identification  | Structure                                                                            | BFOA4 | BFOA3 | BFOA2 | BFOA1 | PGP activity | Biocontrol / antimicrobial activity | Herbicidal/ Insecticide activity                |
|----------|---------------|----------------------------------|---------------------------|--------------------------------------------------------------------------------------|-------|-------|-------|-------|--------------|-------------------------------------|-------------------------------------------------|
| 4.69     | 873           | C <sub>5</sub> H <sub>11</sub> N | Ethyl-2-methylpyrrolidine | 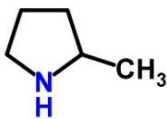   | +     | +     | -     | -     | -            | -                                   | -                                               |
| 5.10     | 942           | C <sub>10</sub> H <sub>16</sub>  | Camphene                  |    | +     | +     | -     | -     | -            | -                                   | -                                               |
| 5.92     | 1003          | C <sub>10</sub> H <sub>22</sub>  | Decane                    |    | -     | +     | -     | -     | -            | -                                   | -                                               |
| 6.02     | 1011          | C <sub>10</sub> H <sub>14</sub>  | p-Cymene                  |    | -     | +     | -     | -     | -            | -                                   | -                                               |
| 6.15     | 1014          | C <sub>12</sub> H <sub>24</sub>  | Trimethyl-1-nonene        |    | +     | +     | -     | -     | -            | -                                   | -                                               |
| 6.43     | 1018          | C <sub>10</sub> H <sub>16</sub>  | D-Limonene                |   | -     | -     | +     | +     | -            | -                                   | Avenger Material Safety Data Sheet <sup>1</sup> |
| 6.78     | 1025          | C <sub>10</sub> H <sub>14</sub>  | o-Cymene                  |  | +     | +     | -     | -     | -            | -                                   | -                                               |

<sup>1</sup> <http://nebula.wsimg.com/07de45c0af774ba73e06362ad1a56f06?AccessKeyId=C67FD801C8FC93742D64&disposition=0&alloworigin=1>

Supplementary Table S5. Continued.

| Rt (min) | Kovat's Index | Molecular formula                 | Tentative identification | Structure                                                                            | BFOA4 | BFOA3 | BFOA2 | BFOA1 | PGP activity | Biocontrol / antimicrobial activity | Herbicidal/ Insecticide activity  |
|----------|---------------|-----------------------------------|--------------------------|--------------------------------------------------------------------------------------|-------|-------|-------|-------|--------------|-------------------------------------|-----------------------------------|
| 6.87     | 1083          | C <sub>10</sub> H <sub>16</sub>   | $\alpha$ -terpinolene    | 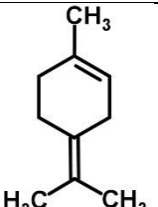   | +     | +     | +     | -     | -            | -                                   | -                                 |
| 7.51     | 1109          | C <sub>10</sub> H <sub>16</sub> O | cis-4-Caranone           |    | +     | +     | -     | -     | -            | -                                   | -                                 |
| 7.66     | 1115          | C <sub>11</sub> H <sub>24</sub>   | Undecane                 |    | +     | +     | -     | -     | -            | -                                   | -                                 |
| 7.88     | 1151          | C <sub>12</sub> H <sub>26</sub>   | Dimethyldecane           |    | +     | +     | -     | -     | -            | -                                   | -                                 |
| 8.15     | 1158          | C <sub>10</sub> H <sub>18</sub> O | Borneol                  |   | +     | +     | -     | -     | -            | -                                   | Chemical Information <sup>2</sup> |
| 8.28     | 1170          | C <sub>12</sub> H <sub>26</sub>   | 2-methyl-undecane        |  | +     | +     | -     | -     | -            | -                                   | -                                 |
| 8.41     | 1179          | C <sub>10</sub> H <sub>16</sub> O | Dihydrocarvone           |  | +     | +     | -     | -     | -            | -                                   | -                                 |

<sup>2</sup> <https://web.archive.org/web/20041107161247/http://sun.ars-grin.gov:8080/npgspub/xsql/duke/chemdisp.xsql?chemical=BORNEOL>

Supplementary Table S5. Continued.

| Rt (min) | Kovat's Index | Molecular formula                 | Tentative identification        | Structure                                                                            | BFOA4 | BFOA3 | BFOA2 | BFOA1 | PGP activity | Biocontrol / antimicrobial activity | Herbicidal/ Insecticide activity |
|----------|---------------|-----------------------------------|---------------------------------|--------------------------------------------------------------------------------------|-------|-------|-------|-------|--------------|-------------------------------------|----------------------------------|
| 8.57     | 1185          | C <sub>10</sub> H <sub>18</sub> O | $\alpha$ -terpineol             | 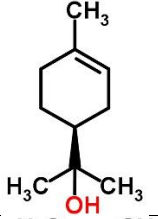   | +     | +     | -     | -     | -            | -                                   | -                                |
| 9.06     | 1201          | C <sub>10</sub> H <sub>16</sub> O | trans-p-mentha-1(7),8-dien-2-ol |    | +     | +     | -     | -     | -            | -                                   | -                                |
| 9.13     | 1209          | C <sub>12</sub> H <sub>26</sub>   | Dodecane                        |    | +     | +     | -     | -     | -            | -                                   | -                                |
| 9.21     | 1216          | C <sub>10</sub> H <sub>16</sub> O | Pulegone                        |    | +     | +     | -     | -     | -            | -                                   | Franzios et al. (1997)           |
| 9.34     | 1234          | C <sub>13</sub> H <sub>28</sub>   | 2,3-dimethylundecane            |  | +     | +     | +     | -     | -            | -                                   | -                                |
| 9.64     | 1271          | C <sub>13</sub> H <sub>24</sub>   | Tridecadiene                    |  | +     | +     | +     | -     | -            | -                                   | -                                |
| 9.99     | 1298          | C <sub>11</sub> H <sub>22</sub> O | 2-undecanone                    |  | +     | +     | -     | -     | -            | -                                   | Stephen et al. (2002)            |

Supplementary Table S5. Continued.

| Rt (min) | Kovat's Index | Molecular formula               | Tentative identification    | Structure                                                                            | BFOA4 | BFOA3 | BFOA2 | BFOA1 | PGP activity | Biocontrol / antimicrobial activity | Herbicidal/ Insecticide activity |
|----------|---------------|---------------------------------|-----------------------------|--------------------------------------------------------------------------------------|-------|-------|-------|-------|--------------|-------------------------------------|----------------------------------|
| 10.51    | 1313          | C <sub>13</sub> H <sub>28</sub> | Tridecane                   |    | +     | +     | +     | -     | -            | -                                   | -                                |
| 10.67    | 1319          | C <sub>14</sub> H <sub>30</sub> | Tetramethyldecane           |    | +     | +     | +     | -     | -            | -                                   | -                                |
| 10.83    | 1349          | C <sub>14</sub> H <sub>30</sub> | Methyltridecane             |    | +     | +     | +     | -     | -            | -                                   | -                                |
| 11.14    | 1381          | C <sub>15</sub> H <sub>32</sub> | Farnesane                   |    | -     | +     | +     | -     | -            | -                                   | -                                |
| 11.93    | 1411          | C <sub>14</sub> H <sub>26</sub> | Tetradecadiene              |    | +     | +     | +     | -     | -            | -                                   | -                                |
| 12.32    | 1417          | C <sub>14</sub> H <sub>30</sub> | Tetradecane                 |    | -     | +     | +     | -     | -            | -                                   | -                                |
| 13.18    | 1423          | C <sub>15</sub> H <sub>24</sub> | <i>trans</i> -Caryophyllene |   | -     | +     | +     | -     | -            | -                                   | -                                |
| 13.26    | 1439          | C <sub>12</sub> H <sub>24</sub> | Cyclododecane               |  | -     | -     | +     | -     | -            | -                                   | -                                |

Supplementary Table S5. Continued.

| Rt (min) | Kovat's Index | Molecular formula                              | Tentative identification   | Structure                                                                            | BFOA4 | BFOA3 | BFOA2 | BFOA1 | PGP activity | Biocontrol / antimicrobial activity | Herbicidal/ Insecticide activity |
|----------|---------------|------------------------------------------------|----------------------------|--------------------------------------------------------------------------------------|-------|-------|-------|-------|--------------|-------------------------------------|----------------------------------|
| 13.38    | 1477          | C <sub>15</sub> H <sub>24</sub>                | Germacrene D               | 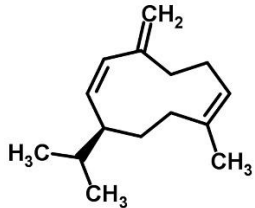   | -     | -     | +     | -     | -            | Adio (2009)                         | Adio (2009)                      |
| 13.57    | 1523          | C <sub>15</sub> H <sub>26</sub> O              | 7-epi-cis-sesquisabinene   |    | -     | -     | +     | -     | -            | -                                   | -                                |
| 13.79    | 1563          | C <sub>18</sub> H <sub>36</sub> O              | Hexa-hydro-farnesyl        |    | -     | +     | +     | -     | -            | -                                   | -                                |
| 14.50    | 1573          | C <sub>15</sub> H <sub>26</sub> O <sub>2</sub> | Geranyl isovalerate        |    | -     | +     | -     | -     | -            | -                                   | -                                |
| 15.94    | 1557          | C <sub>17</sub> H <sub>36</sub>                | Trimethyltetradecane       |   | -     | -     | +     | -     | -            | -                                   | -                                |
| 16.96    | 1612          | C <sub>16</sub> H <sub>34</sub>                | Hexadecane                 |  | -     | -     | +     | -     | -            | -                                   | -                                |
| 34.71    | 1939          | C <sub>18</sub> H <sub>18</sub>                | 1,5-Diphenyl-1,5-hexadiene |  | -     | -     | +     | +     | -            | -                                   | -                                |

Supplementary Table S5. Continued.

| Rt (min) | Kovat's Index | Molecular formula                              | Tentative identification | Structure                                                                          | BFOA4 | BFOA3 | BFOA2 | BFOA1 | PGP activity | Biocontrol / antimicrobial activity | Herbicidal/ Insecticide activity |
|----------|---------------|------------------------------------------------|--------------------------|------------------------------------------------------------------------------------|-------|-------|-------|-------|--------------|-------------------------------------|----------------------------------|
| 35.82    | 2244          | C <sub>22</sub> H <sub>42</sub> O <sub>4</sub> | Diisooctyl adipate       | 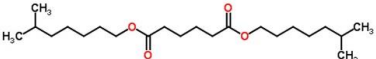 | -     | -     | +     | +     | -            | -                                   | -                                |
| 37.00    | 2704          | C <sub>24</sub> H <sub>38</sub> O <sub>4</sub> | Diisooctyl phthalate     |  | -     | -     | +     | -     | -            | -                                   | -                                |

Supplementary Figure S1. Percentage of fungal (*Fusarium oxysporum* f. sp. *albedinis* strain LMA2) growth inhibition against *Bacillus halotolerans* isolates. Data presents mean  $\pm$  standard error. Bars labelled with different letters are significantly different among the treatments at  $p < 0.05$  using the Tukey's HSD test.

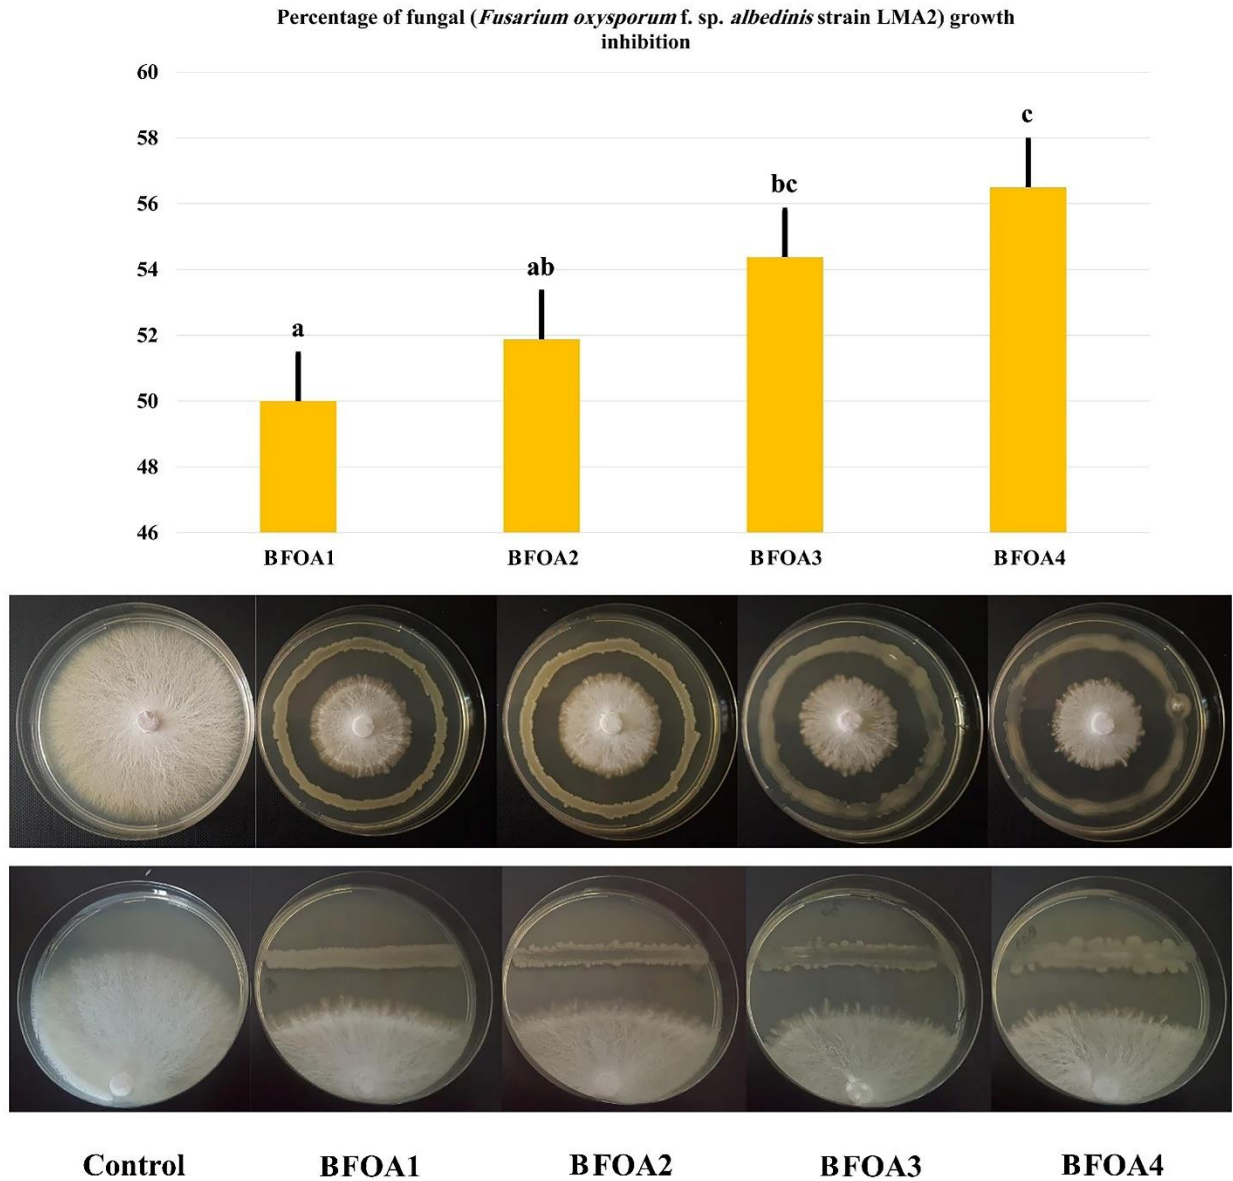



Supplementary Figure S2. *Fusarium oxysporum* f. sp. *albedinis* strains LMA3, LMA4 and LMA5 growth inhibition against *Bacillus halotolerans* isolates.

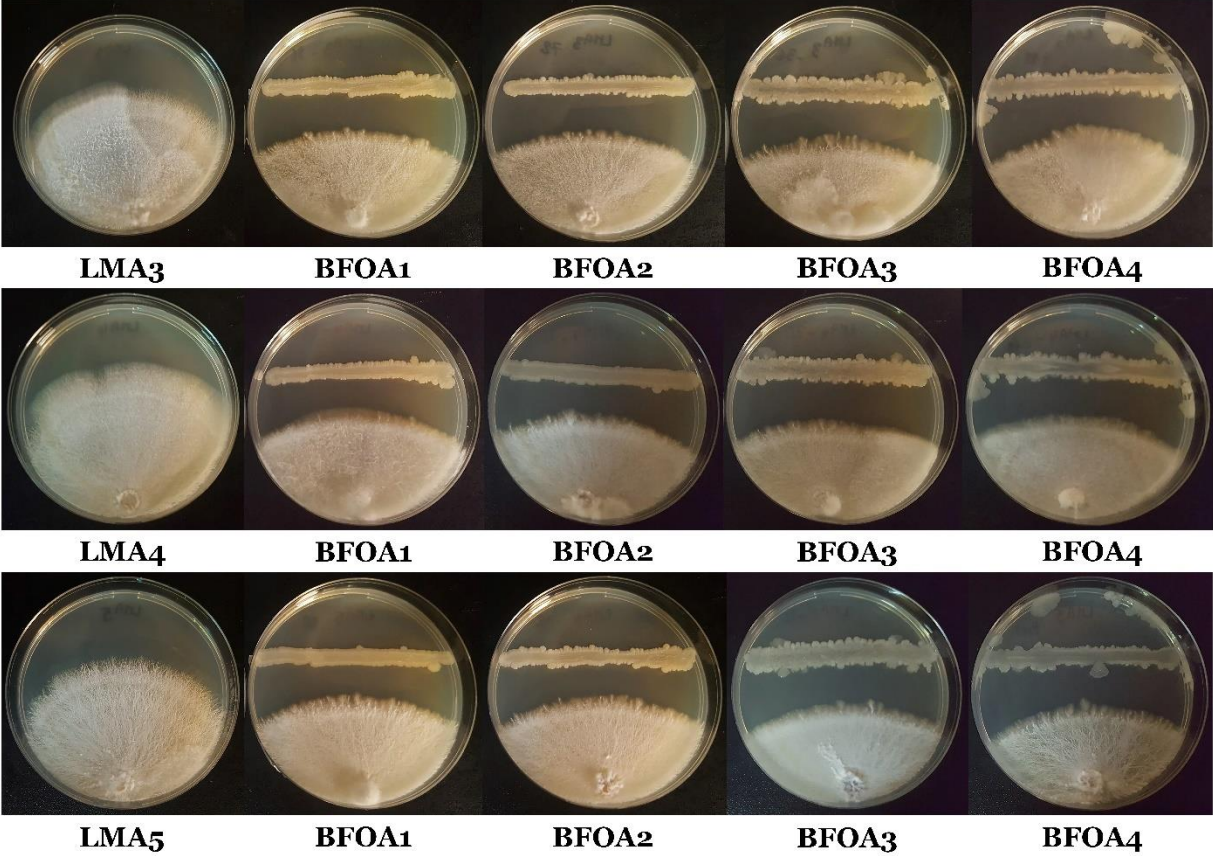

Supplementary Figure S3. Antagonistic effect of the biocontrol agent FOA4 against *Fusarium oxysporum* f. sp. radicis-lycopersici strain FORL. (A) Effects of FOA1-4 bacterial isolates on *Fusarium oxysporum* f. sp. radicis-lycopersici strain FORL tomato fruit rot severity as compared to tomato fruit controls. Data presents mean  $\pm$  standard error. Bars labelled with different letters are significantly different among the treatments at  $p < 0.05$  using the Tukey's HSD test. (B) Effect of preventive, concomitant, and curative biocontrol treatment on tomato fruits at 7 days post-inoculation with *Fusarium oxysporum* f. sp. radicis-lycopersici strain FORL.

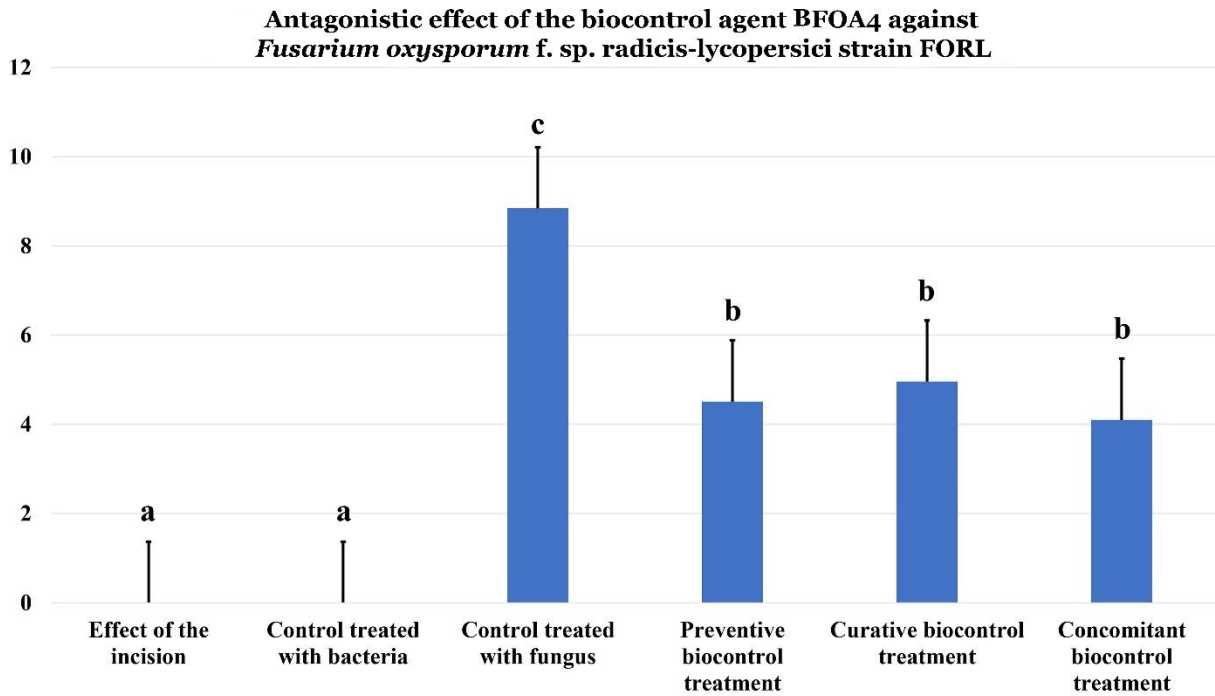

**A**

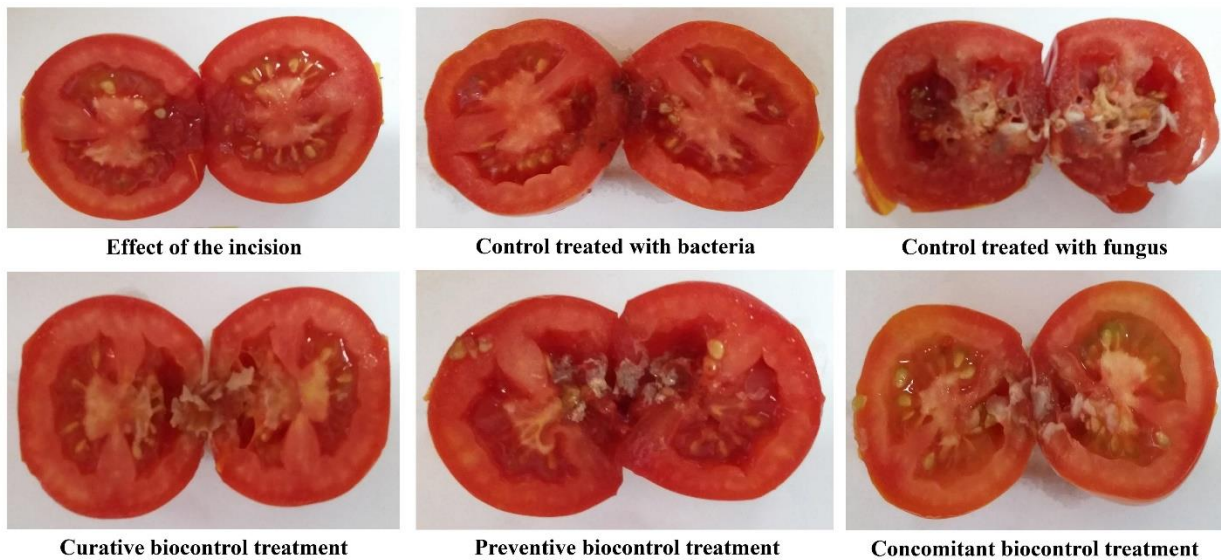

## References

- Adio, A. M. (2009). Germacrenes A–E and related compounds: thermal, photochemical and acid induced transannular cyclizations. *Tetrahedron*. 65, 1533–1552 10.1016/j.tet.2008.11.050
- Biniarz, P., Baranowska, G., Feder-Kubis, J. and Krasowska, A. (2015). The lipopeptides pseudofactin II and surfactin effectively decrease *Candida albicans* adhesion and hydrophobicity. *Antonie Leeuwenhoek*. 108, 343–353. doi: 10.1007/s10482-015-0486-3
- Franzios, G., Mirotsoy, M., Hatziapostolou, E., Kral, J., Scouras, Z. G., Mavragani-Tsipidou, P. (1997). Insecticidal and genotoxic activities of mint essential oils. *J. Agri. Food Chem.* 45 (7), 2690–2694. doi:10.1021/jf960685f
- Fukuchi, N., Furihata, K., Nakayama, J., and Isogai, A. (1995). Rotihibins, novel plant growth regulators from *Streptomyces graminofaciens*. *J. Antibiot.* 48(9), 1004–1010. doi: 10.7164/antibiotics.48.1004
- Gause, G. F., Brazhnikova, M. G. (1944). Gramicidin S and its use in the treatment of infected Wounds. *Nature*. 154(3918): 703–703, doi:10.1038/154703a0
- Guo, X., Zheng, L., Zhou, W. et al. (2011). A case study on chemical defense based on quorum sensing: antibacterial activity of sponge-associated bacterium *Pseudoalteromonas* sp. NJ6-3-1 induced by quorum sensing mechanisms. *Ann Microbiol.* 61(2), 247–255. doi: 10.1007/s13213-010-0129-x
- Hunter, F. E. and Schwartz, L. S. (1967). Tyrocidines and Gramicidin S (J1, J2). In: Gottlieb, D., Shaw, P. D. (eds) *Antibiotics*. Springer, Berlin, Heidelberg.
- Janek, T., Lukaszewicz, M. and Krasowska, A. (2012). Antiadhesive activity of the biosurfactant pseudofactin II secreted by the arctic bacterium *Pseudomonas fluorescens* BD5. *BMC Microbiol.* 12:24.
- Ma, Z. and Hu, J. (2018). Plipastatin A1 produced by a marine sediment-derived *Bacillus amyloliquefaciens* SH-B74 contributes to the control of gray mold disease in tomato. *3 Biotech.* 8(2):125. doi: 10.1007/s13205-018-1144-z
- Sakai, N. and Ohfuné, Y. (1992). Total synthesis of Galantin I. Acid-catalyzed cyclization of galantinic acid. *J. Am. Chem. Soc.* 114, 998–1010.
- Solanas, C., de la Torre, B. G., Fernandez-Reyes, M., et al. (2009). Therapeutic Index of Gramicidin S is Strongly Modulated by D-Phenylalanine Analogues at the Beta-Turn. *J. Med. Chem.* 52, 664–674.
- Stephen, J., Toth, Jr. and Buhler, W. G. (2002). North Carolina State University scientist discovers mosquito repellent in tomatoes. *Pesticide Broadcast*. 12: (5).
- Taylor, H. D. and Schmitz, H. (1976). Antibiotics derived from a mutant of *Bacillus circulans*. *J Antibiot.* 29(5), 532–535.
- Tsuge, K., Ano, T. and Shoda, M. (1996). Isolation of a gene essential for biosynthesis of the lipopeptide antibiotics plipastatin B1 and surfactin in *Bacillus subtilis* YB8. *Arch. Microbiol.* 165(4), 243–251.

Umezawa, H., Aoyagi, T., Nishikiori, T., Okuyama, A., Yamagishi, Y., Hamada, M. and Takeuchi, T. (1986). Plipastatins: new inhibitors of phospholipase A2, produced by *Bacillus cereus* BMG302-fF67. I. Taxonomy, production, isolation and preliminary characterization. *J Antibiot.* (Tokyo). 39 (6), 737-44.

Webb, M. R., Addie, M. S., Crawforth, C. M. et al. (2008). The syntheses of rac-inthomycin A, (+)-inthomycin B and (+)-inthomycin C using a unified synthetic approach. *Tetrahedron.* 64 (21), 4778-4791. doi: 10.1016/j.tet.2008.01.116

Zhang, L. S. and Davies, S. S. (2016). Microbial metabolism of dietary components to bioactive metabolites: opportunities for new therapeutic interventions. *Genome Med.* 8:46. doi: 10.1186/s13073-016-0296-x
